# Supplementary material for: MSH6 haploinsufficiency at relapse contributes to the development of thiopurine resistance in pediatric B-lymphoblastic leukemia
Source: PubMed Central journal article supplement — Haematologica. 2018 Feb 15;103(5):830–9. doi: 10.3324/haematol.2017.176362 (PMC5927991; doi:10.3324/haematol.2017.176362), 2018-05
Supplement: 2017_176362-Disclosures_and_Contributions.pdf [file 2017_176362-Disclosures_and_Contributions.pdf]

Haematologica  
HAEMATOL/2017/176362  
Version 5

MSH6 haploinsufficiency at relapse contributes to the development of thiopurine resistance in pediatric B-lymphoblastic leukemia

Nikki A. Evensen, P. Pallavi Madhusoodhan, Julia Meyer, Jason Saliba, Ashfiyah Chowdhury, David J. Araten, Jacob Nersting, Teena Bhatla, Tiffaney L. Vincent, David Teachey, Stephen P. Hunger, Jun Yang, Kjeld Schmiegelow, and William L. Carroll

Disclosures: None

Contributions: NAE designed and performed experiments, analyzed data, and wrote manuscript. PPM, JAM, JS, AC, DJA, JN, TLV designed and performed experiments and edited manuscript. SPH provided patient samples, analyzed data and edited manuscript. JY, TB analyzed data and edited manuscript. DT, KS supervised experiments and edited manuscript. WLC supervised the project, analyzed data, wrote the manuscript.
